# Supplementary material
Source: MDPI journal article supplement (https://www.mdpi.com/2225-1154/4/3/46)
Supplement: s1 [file s1]

Supplementary Materials: A 133-Year Record of Climate Change and Variability from Sheffield, England

Thomas E. Cropper and Paul E. Cropper

Contains supporting text for the Climate Model Analysis (Figure 5 and 6), Table 7 (section on GEV distribution) and for Figure 8 in the main text and 5 Supplementary Figures.

Supplementary A

Table 7 presents the results of a Generalised Extreme Value distribution fit to time series of TXx, TNn and RX1Day. The time series co-variate is smoothed global mean surface temperature as used in main text references [21-24]. For TNn, we explicitly use the Gumbell distribution and allow the position parameter to vary with the global warming signal. For TXx and RX1Day, we use the GEV distribution and again allow the position parameter to shift and for RX1Day allow both the position parameter and scale parameter to vary with the co-variate. The climate explorer website (https://climexp.knmi.nl/start.cgi) was used for these calculations.

The GEV for our time series of interest *x*, has the probability density function

where *μ*, *σ*, and *ξ* are the location, scale and shape parameters respectively and *ξ* = 0 is the Gumbell Distribution.

Supplementary B

Climate Model output used in this study.

CORDEX (Monthly Mean TX and Precipitation)

RCP2.6

MPI-ESM-LR r1i1p1 x2 & r2i1p1 / EC-EARTH r12i1p1 / MIROC5 r1i1p1 / HadGEM2-ES r1i1p1 /NorESM1-M r1i1p1

RCP4.5

CNRM-CM5 r1i1p1 x2 / ECEARTH r1i1p1 & r3i1p1 & r12i1p1 / HADGEM-2ES r1i1p1 x2 / MPI-ESM-LR r1i1p1 x2 / MPI-ESM-LR r2i1p1 / CanESM2 r1i1p1 / CSIRO-Mk3-6-0 r1i1p1 / IPSL-CM5A-MR r1i1p1 / MIROC5 r1i1p1 / NORESM1-M r1i1p1 / GFDL-ESM2M r1i1p1

RCP8.5

CNRM-CM5 r1i1p1 x3 / ECEARTH r1i1p1 & r3i1p1 & r12i1p1 / HADGEM-2ES r1i1p1 x2 / MPI-ESM-LR r1i1p1 x2 / MPI-ESM-LR r2i1p1 / CanESM2 r1i1p1 / CSIRO-Mk3-6-0 r1i1p1 / IPSL-CM5A-MR r1i1p1 / MIROC5 r1i1p1 / NORESM1-M r1i1p1 / GFDL-ESM2M r1i1p1

**NEX (Daily TX and Precipitation)**

(All r1i1p1) ACCESS1-0 / BCC-CSM-1-1 / BNU-ESM / CanESM2 / CCSM4 / CESM1-BGC / CNRM-CM5 / CSIRO-MK3-6-0 / GFDL-CM3 / GFDL-ESM2G / GFDL-ESM2M / INMCM4 / IPSL-CM5A-LR / IPSLCM5B-MR / MIROC5 / MIROC-ESM / MIROC-ESM-CHEM / MPI-ESM-LR / MPI-ESM-MR / MRI-CGCM3 / NorESM1-1

Supplementary C

For figure 8 in the main text, the indices were downloaded from the following locations:

NAO – https://climatedataguide.ucar.edu/climate-data/hurrell-north-atlantic-oscillation-nao-index-pc-based

AO – Climate Explorer (Climate Prediction Center Version)

GBI – Kindly provided by E. Hanna. (Hanna et al., 2016; main text reference 17)

AMO – Climate Explorer using HADISST data

ENSO – http://www.esrl.noaa.gov/psd/data/correlation/mei.data

Sea_Ice – NSIDC

QBO – http://www.esrl.noaa.gov/psd/data/climateindices/list/

TSI – Climate Explorer (http://www.pmodwrc.ch/pmod.php?topic=tsi/composite/SolarConstant)

EA – Climate Explorer (Climate Prediction Center Version)

EA-WR – Climate Explorer (Climate Prediction Center Version)

SCAND – Climate Explorer (Climate Prediction Center Version)

Polar_Eur – Climate Explorer (Climate Prediction Center Version)


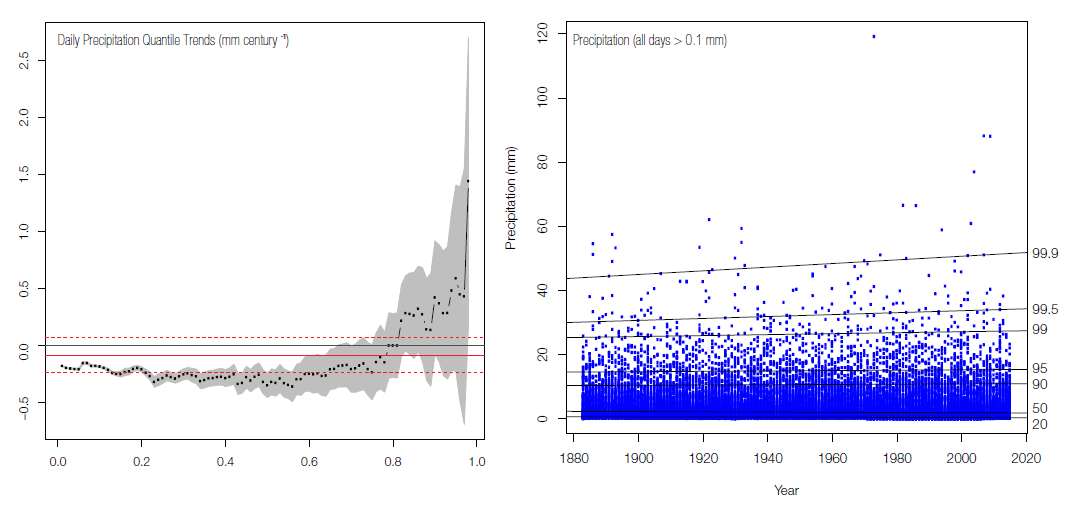


**Figure S1.** Quantile regression (main text ref [19]) of days with daily precipitation > 0.1 mm in the WP record. Numbers on the right y-axis of the right panel indicate lines of specific quantile trends.


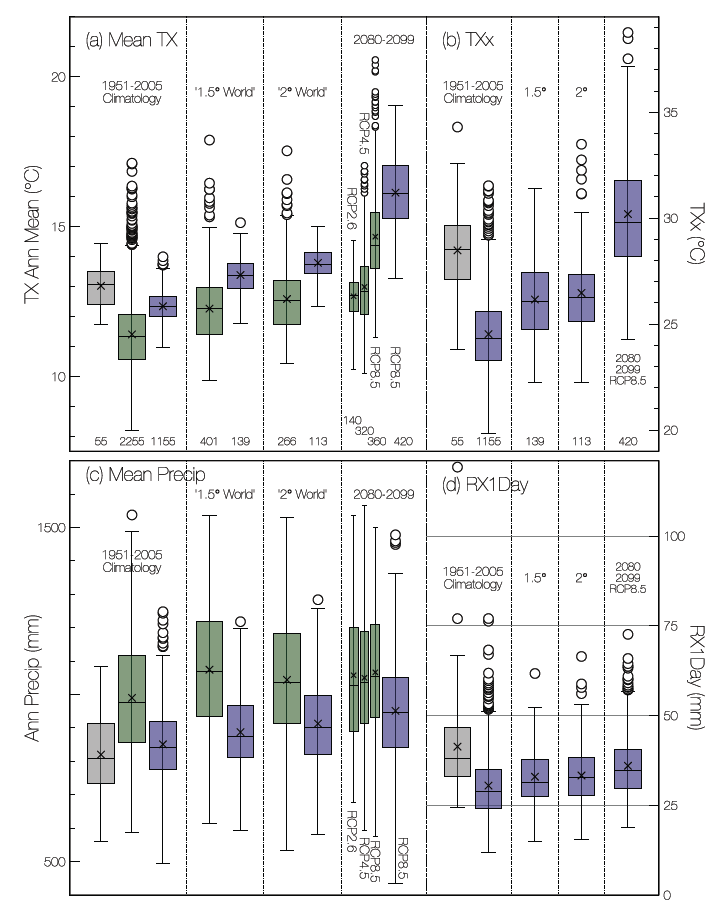


**Figure S2.** As Figure 6 in the main text but plotted using absolute values as opposed to anomalies.


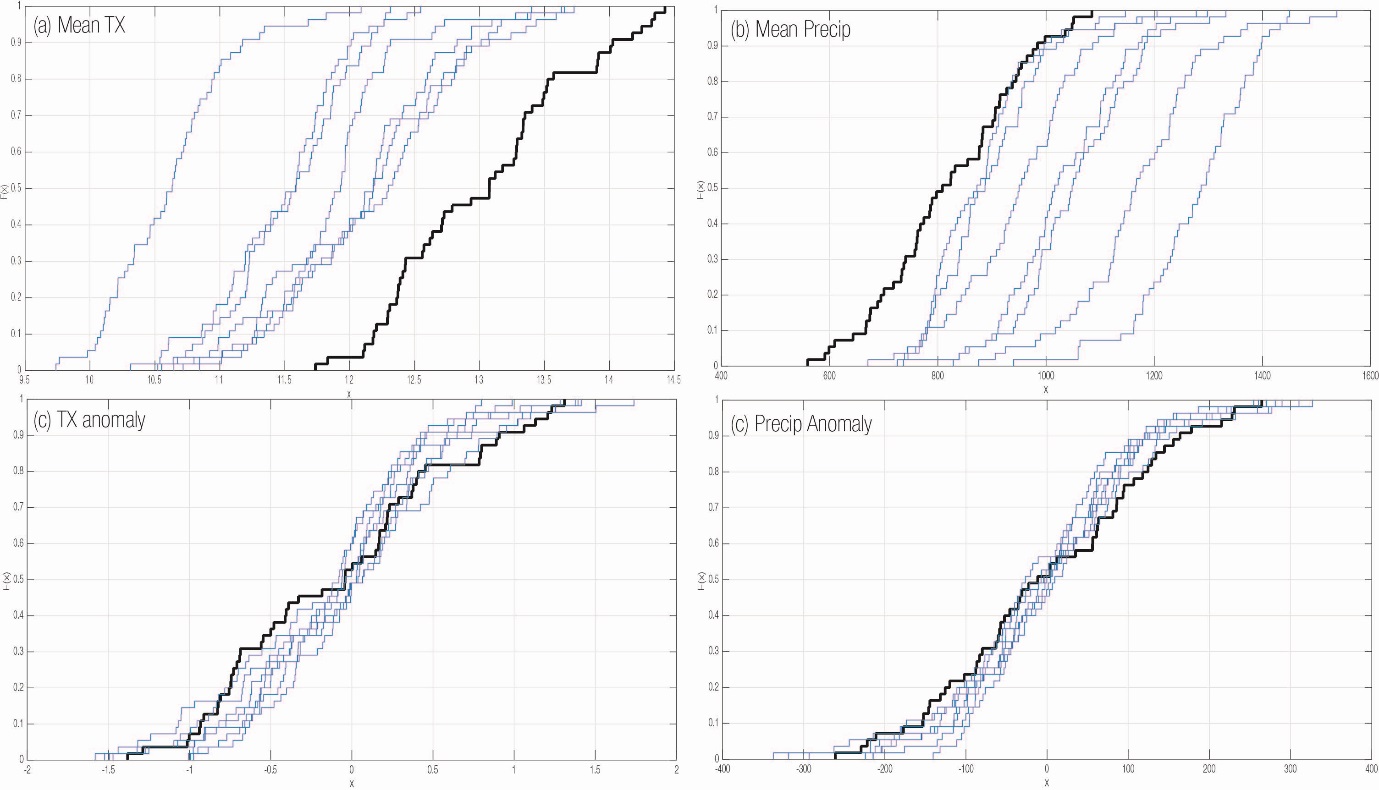


**Figure S3.** Empirical Cumulative Distribution function of (a) mean TX and (b) precipitation from WP and seven CORDEX RCP2.6 models for the 1951-2005 period. Plots (c) and (d) are as (a) and (d) except with the 1951-2005 mean subtracted.


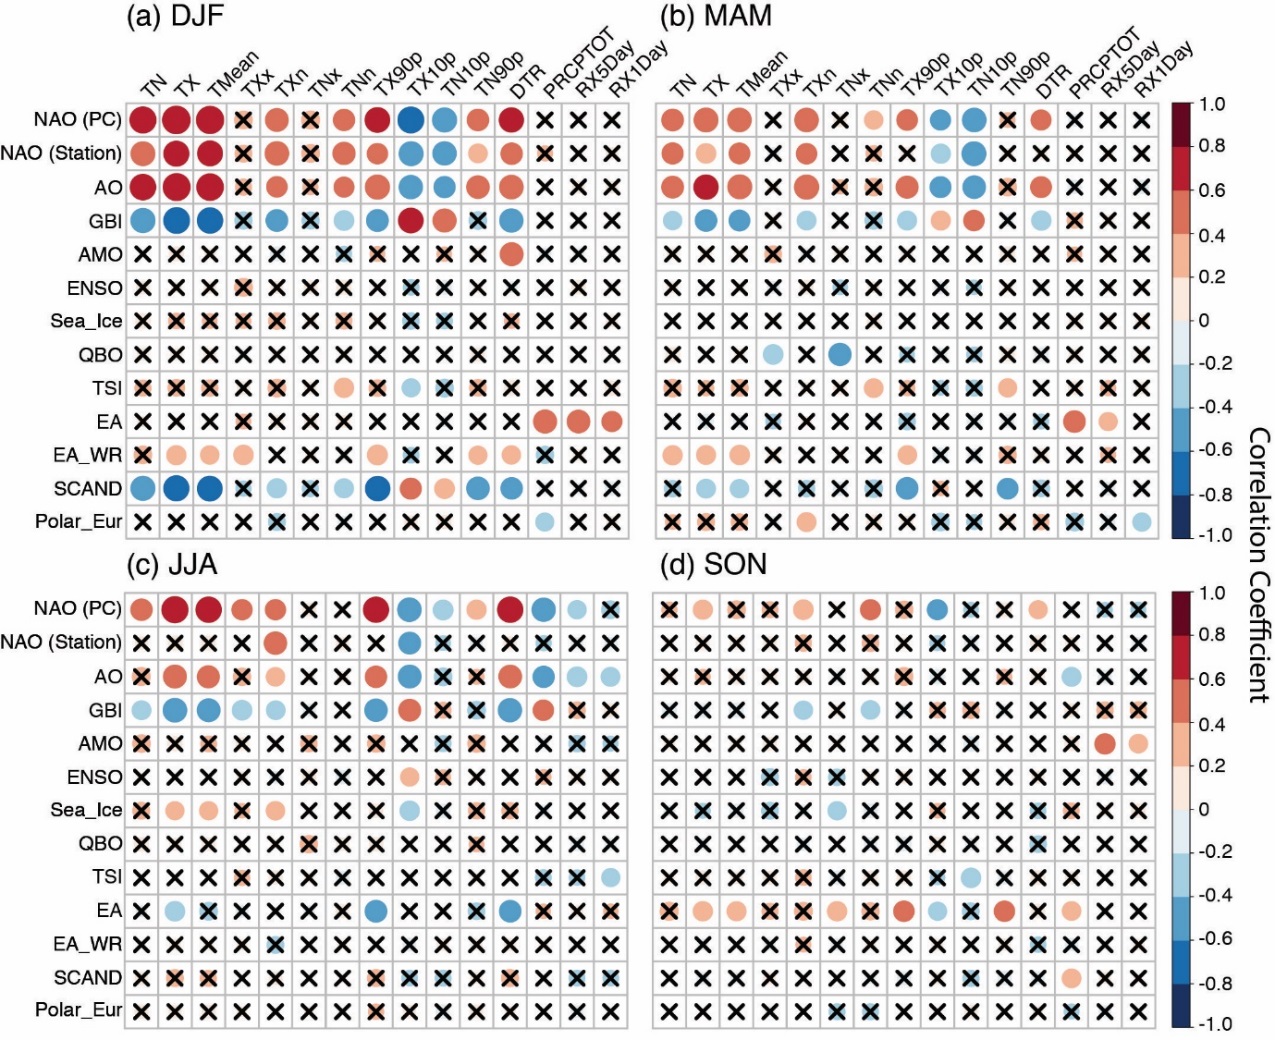


**Figure S4**. As Figure 7 in the text but using detrended anomalies rather than raw data.


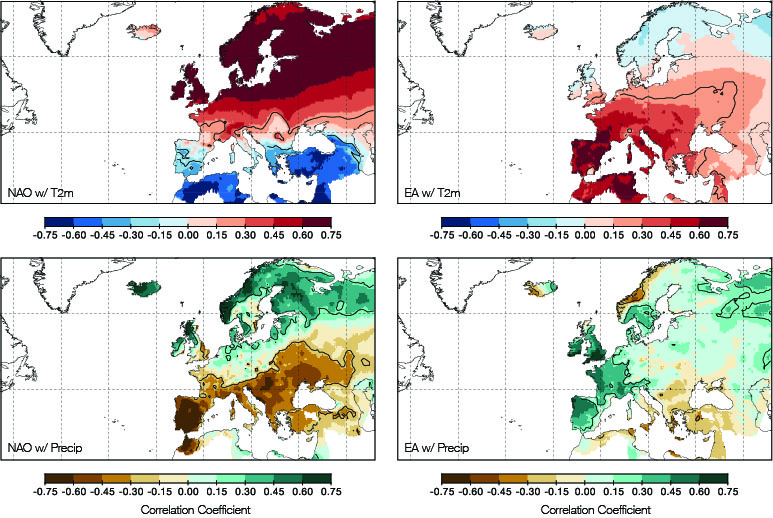


**Figure S5**. The winter (DJF) correlation of the NAO and EA indices with 2m-temperature and precipitation from the E-OBS dataset (1950-2014, detrended anomalies). The solid black line marks regions of P < 0.05.

© 2015 by the authors; licensee MDPI, Basel, Switzerland. This article is an open access article distributed under the terms and conditions of the Creative Commons by Attribution (CC-BY) license (http://creativecommons.org/licenses/by/4.0/).
